# Supplementary material for: Response of White Cabbage (Brassica oleracea var. capitata) to Single and Repeated Short-Term Waterlogging
Source: MDPI journal article supplement (doi:10.3390/agronomy13010200), 2023-01-09
Supplement: s1 [file s1]

## Supplementary material

**Table S1.** Flooding effects on chlorophyll fluorescence traits

|                  |                                         | Fv/Fm        |                 | Fq/Fm'      |                 | rETR             |                    | NPQ         |                 | qP          |                 | qN          |                 | qL           |                 | Φ <sub>no</sub> |                 | Φ <sub>npq</sub>         |                 |
|------------------|-----------------------------------------|--------------|-----------------|-------------|-----------------|------------------|--------------------|-------------|-----------------|-------------|-----------------|-------------|-----------------|--------------|-----------------|-----------------|-----------------|--------------------------|-----------------|
| At the beginning | Day 0                                   | 0.81 ± 0.01  |                 | 0.50 ± 0.03 |                 | 5495.93 ± 452.56 |                    | 0.76 ± 0.22 |                 | 0.70 ± 0.02 |                 | 0.46 ± 0.08 |                 | 0.42 ± 0.01  |                 | 0.29 ± 0.02     |                 | 0.208<br>0.04853<br>8644 |                 |
|                  |                                         | Control      | Flooded samples | Control     | Flooded samples | Control          | Flooded samples    | Control     | Flooded samples | Control     | Flooded samples | Control     | Flooded samples | Control      | Flooded samples | Control         | Flooded samples | Control                  | Flooded samples |
| Treatment 1      | After 1 <sup>st</sup> flood             | 0.80 ± 0.01  | 0.79 ± 0.01     | 0.55 ± 0.03 | 0.46 ± 0.06     | 5915.30 ± 160.94 | 4913.83 ± 815.23   | 0.38 ± 0.07 | 0.87 ± 0.36     | 0.74 ± 0.02 | 0.67 ± 0.06     | 0.31 ± 0.04 | 0.47 ± 0.10     | 0.43 ± 0.001 | 0.41 ± 0.04     | 0.33 ± 0.003    | 0.30 ± 0.02     | 0.12 ± 0.02              | 0.24 ± 0.08     |
|                  | At the end (recovery)                   | 0.69 ± 0.02  | 0.70 ± 0.05     | 0.31 ± 0.01 | 0.32 ± 0.03     | 3222.93 ± 70.62  | 3556.73 ± 252.89   | 1.69 ± 0.05 | 1.42 ± 0.12 *   | 0.64 ± 0.03 | 0.63 ± 0.03     | 0.72 ± 0.01 | 0.68 ± 0.02 *   | 0.51 ± 0.04  | 0.48 ± 0.06     | 0.26 ± 0.01     | 0.29 ± 0.02     | 0.43 ± 0.01              | 0.39 ± 0.02 *   |
| Treatment 2      | Before 2 <sup>nd</sup> flood (recovery) | 0.78 ± 0.01  | 0.78 ± 0.01     | 0.42 ± 0.05 | 0.47 ± 0.03     | 4455.10 ± 338.41 | 5323.10 ± 200.84 * | 1.07 ± 0.19 | 0.70 ± 0.13 *   | 0.64 ± 0.04 | 0.69 ± 0.02     | 0.57 ± 0.05 | 0.45 ± 0.05     | 0.41 ± 0.02  | 0.43 ± 0.01     | 0.29 ± 0.004    | 0.32 ± 0.004 ** | 0.29 ± 0.05              | 0.21 ± 0.03     |
|                  | After 2 <sup>nd</sup> flood             | 0.75 ± 0.003 | 0.72 ± 0.03     | 0.34 ± 0.04 | 0.38 ± 0.05     | 3575.47 ± 423.07 | 4256.17 ± 466.12   | 1.55 ± 0.28 | 1.12 ± 0.23     | 0.60 ± 0.04 | 0.69 ± 0.03     | 0.68 ± 0.06 | 0.60 ± 0.06     | 0.43 ± 0.03  | 0.51 ± 0.04     | 0.27 ± 0.02     | 0.30 ± 0.01 *   | 0.40 ± 0.06              | 0.32 ± 0.06     |
|                  | At the end (recovery)                   | 0.69 ± 0.02  | 0.69 ± 0.01     | 0.31 ± 0.01 | 0.33 ± 0.01     | 3222.93 ± 70.62  | 3586.03 ± 186.95 * | 1.69 ± 0.05 | 1.31 ± 0.12 **  | 0.64 ± 0.03 | 0.64 ± 0.03     | 0.72 ± 0.01 | 0.66 ± 0.03 *   | 0.51 ± 0.04  | 0.49 ± 0.05     | 0.26 ± 0.01     | 0.30 ± 0.01 *   | 0.29 ± 0.05              | 0.37 ± 0.02 *   |
| Treatment 3      | After flood                             | 0.75 ± 0.003 | 0.74 ± 0.01     | 0.34 ± 0.04 | 0.43 ± 0.05     | 3575.47 ± 423.07 | 4507.00 ± 535.69   | 1.55 ± 0.28 | 0.95 ± 0.29     | 0.60 ± 0.04 | 0.70 ± 0.03 *   | 0.68 ± 0.06 | 0.54 ± 0.09     | 0.43 ± 0.03  | 0.50 ± 0.02 *   | 0.27 ± 0.02     | 0.30 ± 0.02     | 0.40 ± 0.06              | 0.27 ± 0.06     |
|                  | At the end (recovery)                   | 0.69 ± 0.02  | 0.69 ± 0.02     | 0.31 ± 0.01 | 0.35 ± 0.04     | 3222.93 ± 70.62  | 3900.57 ± 333.31 * | 1.69 ± 0.05 | 1.19 ± 0.22 *   | 0.64 ± 0.03 | 0.68 ± 0.01     | 0.72 ± 0.01 | 0.63 ± 0.05     | 0.51 ± 0.04  | 0.54 ± 0.02     | 0.26 ± 0.01     | 0.30 ± 0.02 *   | 0.29 ± 0.05              | 0.35 ± 0.05     |

\* p < 0.05; \*\* p < 0.01

**Table S2.** Flooding effects on multispectral traits

|                  |                                         | Red              |                  | Green            |                  | Blue             |                   | Hue           |                 | Saturation  |                 | Value         |                 |
|------------------|-----------------------------------------|------------------|------------------|------------------|------------------|------------------|-------------------|---------------|-----------------|-------------|-----------------|---------------|-----------------|
| At the beginning | Day 0                                   | 2967.00 ± 129.19 |                  | 4431.33 ± 164.97 |                  | 2439.33 ± 137.73 |                   | 105.63 ± 1.32 |                 | 0.45 ± 0.01 |                 | 0.067 ± 0.003 |                 |
|                  |                                         | Control          | Flooded samples  | Control          | Flooded samples  | Control          | Flooded samples   | Control       | Flooded samples | Control     | Flooded samples | Control       | Flooded samples |
| Treatment 1      | After 1 <sup>st</sup> flood             | 2763.00 ± 206.37 | 3059.33 ± 74.10  | 4112.67 ± 331.63 | 4358.00 ± 165.64 | 2336.67 ± 62.07  | 2496.67 ± 47.90 * | 107.87 ± 3.67 | 106.90 ± 2.19   | 0.44 ± 0.03 | 0.43 ± 0.03     | 0.063 ± 0.005 | 0.067 ± 0.002   |
|                  | At the end (recovery)                   | 3787.00 ± 262.81 | 3960.33 ± 512.16 | 4471.67 ± 263.04 | 4967.33 ± 488.58 | 3115.67 ± 100.86 | 3305.00 ± 224.85  | 101.90 ± 5.51 | 103.83 ± 8.26   | 0.35 ± 0.03 | 0.35 ± 0.03     | 0.071 ± 0.005 | 0.076 ± 0.008   |
| Treatment 2      | Before 2 <sup>nd</sup> flood (recovery) | 3038.00 ± 230.44 | 3251.33 ± 424.86 | 4357.67 ± 331.80 | 4525.00 ± 448.85 | 2665.33 ± 151.37 | 2895.67 ± 343.58  | 112.80 ± 5.89 | 111.43 ± 1.19   | 0.41 ± 0.04 | 0.39 ± 0.02     | 0.067 ± 0.005 | 0.069 ± 0.007   |
|                  | After 2 <sup>nd</sup> flood             | 3175.33 ± 114.82 | 3579.33 ± 274.86 | 4349.67 ± 219.48 | 4349.67 ± 241.79 | 2717.33 ± 220.36 | 3016.00 ± 194.19  | 109.07 ± 3.74 | 101.27 ± 11.40  | 0.40 ± 0.02 | 0.34 ± 0.04     | 0.067 ± 0.003 | 0.068 ± 0.004   |
|                  | At the end (recovery)                   | 3787.00 ± 262.81 | 3991.33 ± 142.70 | 4471.67 ± 263.04 | 4769.33 ± 224.48 | 3115.67 ± 100.86 | 3254.67 ± 152.66  | 101.90 ± 5.51 | 97.37 ± 3.51    | 0.35 ± 0.03 | 0.35 ± 0.01     | 0.071 ± 0.005 | 0.074 ± 0.003   |
| Treatment 3      | After flood                             | 3175.33 ± 114.82 | 3205.00 ± 260.58 | 4349.67 ± 219.48 | 4150.67 ± 292.67 | 2717.33 ± 220.36 | 2800.67 ± 144.58  | 109.07 ± 3.74 | 108.07 ± 0.47   | 0.40 ± 0.02 | 0.35 ± 0.01     | 0.067 ± 0.003 | 0.064 ± 0.005   |
|                  | At the end (recovery)                   | 3787.00 ± 262.81 | 3757.33 ± 162.85 | 4471.67 ± 263.04 | 4253.67 ± 111.79 | 3115.67 ± 100.86 | 3131.67 ± 39.27   | 101.90 ± 5.51 | 98.17 ± 6.94    | 0.35 ± 0.03 | 0.31 ± 0.02     | 0.071 ± 0.005 | 0.068 ± 0.003   |

**Table S3.** Flooding effects on multispectral traits

|                  |                                         | SpcGrn           |                  | FarRed           |                  | Nir                |                   | ChlIdx      |                 | AriIdx      |                 |
|------------------|-----------------------------------------|------------------|------------------|------------------|------------------|--------------------|-------------------|-------------|-----------------|-------------|-----------------|
| At the beginning | Day 0                                   | 4922.33 ± 175.90 |                  | 7046.33 ± 176.79 |                  | 19529.33 ± 264.45  |                   | 1.79 ± 0.07 |                 | 1.25 ± 0.10 |                 |
|                  |                                         | Control          | Flooded samples  | Control          | Flooded samples  | Control            | Flooded samples   | Control     | Flooded samples | Control     | Flooded samples |
| Treatment 1      | After 1 <sup>st</sup> flood             | 4571.00 ± 372.95 | 4788.67 ± 193.33 | 6781.00 ± 387.93 | 6986.66 ± 236.14 | 19876.00 ± 328.656 | 19429.33 ± 560.26 | 1.96 ± 0.22 | 1.83 ± 0.01     | 1.51 ± 0.24 | 1.38 ± 0.03     |
|                  | At the end (recovery)                   | 4739.67 ± 286.43 | 5297.67 ± 467.07 | 8089.67 ± 512.50 | 8335.33 ± 751.73 | 18658.00 ± 759.95  | 19417.33 ± 618.01 | 1.45 ± 0.10 | 1.42 ± 0.17     | 1.65 ± 0.15 | 1.45 ± 0.11     |
| Treatment 2      | Before 2 <sup>nd</sup> flood (recovery) | 4794.33 ± 357.78 | 4958.00 ± 463.03 | 6969.00 ± 523.09 | 7427.67 ± 517.50 | 19949.33 ± 325.38  | 20277.67 ± 55.05  | 1.92 ± 0.18 | 1.78 ± 0.19     | 1.38 ± 0.10 | 1.43 ± 0.24     |
|                  | After 2 <sup>nd</sup> flood             | 4724.67 ± 249.24 | 4632.00 ± 235.65 | 7258.33 ± 142.11 | 8116.00 ± 634.05 | 19684.67 ± 26.39   | 19281.33 ± 385.16 | 1.79 ± 0.09 | 1.44 ± 0.18 *   | 1.53 ± 0.22 | 1.86 ± 0.05     |
|                  | At the end (recovery)                   | 4739.67 ± 286.43 | 5063.33 ± 246.46 | 8089.67 ± 512.50 | 8436.00 ± 69.42  | 18658.00 ± 759.95  | 18571.67 ± 165.18 | 1.45 ± 0.10 | 1.28 ± 0.01     | 1.65 ± 0.15 | 1.55 ± 0.17     |
| Treatment 3      | After flood                             | 4724.67 ± 249.24 | 4466.00 ± 297.07 | 7258.33 ± 142.11 | 7370.67 ± 247.95 | 19684.67 ± 26.39   | 19600.67 ± 429.82 | 1.79 ± 0.09 | 1.74 ± 0.12     | 1.53 ± 0.22 | 1.82 ± 0.28     |
|                  | At the end (recovery)                   | 4739.67 ± 286.43 | 4491.00 ± 120.93 | 8089.67 ± 512.50 | 8518.67 ± 276.15 | 18658.00 ± 759.95  | 19237.00 ± 251.48 | 1.45 ± 0.10 | 1.37 ± 0.03     | 1.65 ± 0.15 | 2.08 ± 0.10 *   |

**Table S4.** List of analyzed traits with abbreviations. indication if it is measured or calculated trait. wavelength for measurement or equation for calculation. device and software. and the reference if appropriate.

| Trait                                                                | Abbreviation                     | Trait group                           | Measured or calculated | Wavelength/equation                                              | Device and software | Reference                 |
|----------------------------------------------------------------------|----------------------------------|---------------------------------------|------------------------|------------------------------------------------------------------|---------------------|---------------------------|
| Minimum Fluorescence of Dark-adapted Leaves                          | F <sub>0</sub>                   | Chlorophyll fluorescence traits (CFT) | measured               | see description in Material nd Methods section                   | CropReporter. DA    |                           |
| Maximum Fluorescence of Dark-adapted Leaves                          | F <sub>m</sub>                   |                                       | measured               | see description in Material nd Methods section                   | CropReporter. DA    |                           |
| Steady-state Fluorescence Yield                                      | F <sub>v</sub>                   |                                       | measured               | see description in Material nd Methods section                   | CropReporter. DA    |                           |
| Maximum Chlorophyll Fluorescence of Light-adapted Leaves             | F <sub>m</sub> '                 |                                       | measured               | see description in Material nd Methods section                   | CropReporter. DA    |                           |
| Minimum fluorescence yield of illuminated plant                      | F <sub>o</sub> '                 |                                       | estimated              | see description in Material nd Methods section                   | CropReporter. DA    |                           |
| Maximum Efficiency of Photosystem Two                                | F <sub>v</sub> /F <sub>m</sub>   |                                       | calculated             | $F_v/F_m = (F_m - F_0)/F_m$                                      | CropReporter. DA    | Kitajima and Butler. 1975 |
| Effective Quantum Yield of Photosystem Two                           | F <sub>q</sub> /F <sub>m</sub> ' |                                       | calculated             | $F_q'/F_m' = (F_m' - F_s')/F_m'$                                 | CropReporter. DA    | Genty et al.. 1989        |
| Electron Transport Rate                                              | ETR                              |                                       | calculated             | $ETR = F_q'/F_m' \times PPFD \times (0.5)$                       | CropReporter. DA    | Genty et al.. 1989        |
| Non-Photochemical Quenching                                          | NPQ                              |                                       | calculated             | $NPQ = (F_m - F_m')/F_m'$                                        | CropReporter. DA    | Bilger and Björkman. 1990 |
| Coefficient of photochemical quenching                               | qP                               |                                       | calculated             | $qP = (F_m' - F_s)/F_v$                                          | CropReporter. DA    | Schreiber et al.. 1986    |
| Coefficient of non-photochemical quenching                           | qN                               |                                       | calculated             | $qN = 1 - (F_m' - F_o')/(F_m - F_o)$ .                           | CropReporter. DA    | Schreiber et al.. 1986    |
| Estimation of 'open' reaction centers on basis of a lake model       | qL                               |                                       | calculated             | $qL = ((F_m' - F_s') \times F_o') / ((F_m' - F_o') \times F_s')$ | CropReporter. DA    | Kramer et al.. 2004       |
| Quantum yield of non-regulated non-photochemical energy loss in PSII | φ <sub>nq</sub>                  |                                       | calculated             | $\phi_{nq} = 1/(NPQ + 1 + qL(F_m/F_o - 1))$                      | CropReporter. DA    | Genty et al.. 1996        |
| Quantum yield of regulated non-photochemical energy loss in PSII     | φ <sub>npq</sub>                 |                                       | calculated             | $\phi_{npq} = 1 - \phi_{psII} - 1/(NPQ + 1 + qL(F_m/F_o - 1))$   | CropReporter. DA    | Genty et al.. 1996        |
| Reflectance in Red                                                   | R <sub>Red</sub>                 | Multispectral traits (MST)            | measured               | 640nm                                                            | CropReporter. DA    |                           |
| Reflectance in Green                                                 | R <sub>Green</sub>               |                                       | measured               | 550nm                                                            | CropReporter. DA    |                           |
| Reflectance in Blue                                                  | R <sub>Blue</sub>                |                                       | measured               | 475nm                                                            | CropReporter. DA    |                           |
| Reflectance in Specific green                                        | R <sub>SpGreen</sub>             |                                       | measured               | 510-590nm                                                        | CropReporter. DA    |                           |
| Reflectance in Far Red                                               | R <sub>FarRed</sub>              |                                       | measured               | 710nm                                                            | CropReporter. DA    |                           |
| Reflecatnce in Near Infra Red                                        | R <sub>NIR</sub>                 |                                       | measured               | 769nm                                                            | CropReporter. DA    |                           |
| Reflectance Specific to Chlorophyll                                  | R <sub>Chl</sub>                 |                                       | measured               | 730nm                                                            | CropReporter. DA    |                           |
| Reflectance Specific to Anthocyanins                                 | R <sub>Anth</sub>                |                                       | measured               | 550nm                                                            | CropReporter. DA    |                           |

|                   |     |  |            |                                                                                                                                                                                                                                                                                                                                                                                                                                                           |                  |                       |
|-------------------|-----|--|------------|-----------------------------------------------------------------------------------------------------------------------------------------------------------------------------------------------------------------------------------------------------------------------------------------------------------------------------------------------------------------------------------------------------------------------------------------------------------|------------------|-----------------------|
| Hue (0-360°)      | HUE |  | calculated | $\text{HUE} = 60 \times (0 + (R_{\text{Green}} - R_{\text{Blue}}) / (\text{max} - \text{min})), \text{ if } \text{max} = R_{\text{Red}};$ $\text{HUE} = 60 \times (2 + (R_{\text{Blue}} - R_{\text{Red}}) / (\text{max} - \text{min})), \text{ if } \text{max} = R_{\text{Green}};$ $\text{HUE} = 60 \times (4 + (R_{\text{Red}} - R_{\text{Green}}) / (\text{max} - \text{min})), \text{ if } \text{max} = R_{\text{Blue}};$ 360 was added in case HUE<0 | CropReporter. DA |                       |
| Saturation (0-1)  | SAT |  | calculated | $\text{SAT} = (\text{max} - \text{min}) / (\text{max} + \text{min}) \text{ if } \text{VAL} > 0.5.$ or $\text{SAT} = (\text{max} - \text{min}) / (2.0 - \text{max} - \text{min}) \text{ if } \text{VAL} < 0.5.$ where max and min are selected from the $R_{\text{Red}}, R_{\text{Green}}, R_{\text{Blue}}$                                                                                                                                                | CropReporter. DA |                       |
| Value (0-1)       | VAL |  | calculated | $\text{VAL} = (\text{max} + \text{min}) / 2;$ where max and min are selected from the $R_{\text{Red}}, R_{\text{Green}}, R_{\text{Blue}}$                                                                                                                                                                                                                                                                                                                 | CropReporter. DA |                       |
| Anthocyanin index | ARI |  | calculated | $\text{ARI} = (R_{550})^{-1} - (R_{700})^{-1}$                                                                                                                                                                                                                                                                                                                                                                                                            | CropReporter. DA | Gitelson et al., 2001 |
| Chlorophyll index | CHI |  | calculated | $\text{CHI} = (R_{700})^{-1} - (R_{769})^{-1}$                                                                                                                                                                                                                                                                                                                                                                                                            | CropReporter. DA | Gitelson et al., 2003 |

**Table S5.** Flooding effects on elements and mineral composition

|                  |                                         | mg NO3/kg       |                 | % N         |                 | % P         |                 | %K          |                 | %Ca            |                 | % Mg         |                 | mg Fe/kg DW   |                 | mg Zn/kg DW  |                 | mg Mn/kg DW  |                 | mg Cu/kg DW |                 |
|------------------|-----------------------------------------|-----------------|-----------------|-------------|-----------------|-------------|-----------------|-------------|-----------------|----------------|-----------------|--------------|-----------------|---------------|-----------------|--------------|-----------------|--------------|-----------------|-------------|-----------------|
| At the beginning | Day 0                                   | 221.08 ± 160.23 |                 | 2.21 ± 0.22 |                 | 0.32 ± 0.01 |                 | 2.99 ± 0.24 |                 | 319.61 ± 39.56 |                 | 46.70 ± 3.72 |                 | 17.89 ± 7.30  |                 | 24.68 ± 1.83 |                 | 72.13 ± 6.24 |                 | 3.04 ± 0.51 |                 |
|                  |                                         | Control         | Flooded samples | Control     | Flooded samples | Control     | Flooded samples | Control     | Flooded samples | Control        | Flooded samples | Control      | Flooded samples | Control       | Flooded samples | Control      | Flooded samples | Control      | Flooded samples | Control     | Flooded samples |
| Treatment 1      | After 1 <sup>st</sup> flood             | 139.16 ± 69.27  | 111.63 ± 77.08  | 2.15 ± 0.41 | 1.99 ± 0.20     | 0.35 ± 0.04 | 0.23 ± 0.02 **  | 3.01 ± 0.17 | 2.19 ± 0.07 **  | 240.15 ± 20.01 | 233.03 ± 36.52  | 40.00 ± 3.5  | 32.80 ± 5.30    | 72.09 ± 20.69 | 63.46 ± 9.72    | 22.22 ± 2.38 | 15.43 ± 4.23 *  | 57.34 ± 2.23 | 56.34 ± 14.74   | 2.69 ± 0.15 | 2.04 ± 0.31*    |
|                  | At the end (recovery)                   | 188.69 ± 204.14 | 64.32 ± 7.07    | 0.94 ± 0.05 | 0.97 ± 0.08     | 0.20 ± 0.02 | 0.21 ± 0.04     | 2.55 ± 0.13 | 1.96 ± 0.42     | 142.27 ± 16.83 | 165.12 ± 14.42  | 19.90 ± 1.81 | 19.50 ± 2.36    | 36.13 ± 3.25  | 39.01 ± 6.55    | 15.41 ± 1.32 | 13.07 ± 2.06    | 27.70 ± 1.12 | 38.01 ± 3.84    | 3.64 ± 1.15 | 6.98 ± 8.76     |
| Treatment 2      | Before 2 <sup>nd</sup> flood (recovery) | 284.70 ± 76.67  | 214.84 ± 16.36  | 1.64 ± 0.24 | 1.34 ± 0.09     | 0.28 ± 0.02 | 0.25 ± 0.04     | 2.98 ± 0.24 | 2.05 ± 0.24     | 217.42 ± 22.07 | 204.85 ± 22.38  | 35.97 ± 2.66 | 28.09 ± 2.80 *  | 44.64 ± 4.41  | 45.21 ± 8.92    | 19.25 ± 0.82 | 15.49 ± 2.51    | 41.67 ± 4.73 | 51.41 ± 7.29    | 2.28 ± 0.06 | 1.96 ± 0.14 *   |
|                  | After 2 <sup>nd</sup> flood             | 68.53 ± 14.01   | 154.85 ± 123.03 | 1.34 ± 0.13 | 1.11 ± 0.07     | 0.23 ± 0.02 | 0.28 ± 0.07     | 2.68 ± 0.07 | 1.60 ± 0.14 **  | 185.63 ± 11.92 | 174.19 ± 11.89  | 27.3 ± 3.10  | 18.90 ± 0.40    | 43.41 ± 2.12  | 33.44 ± 3.54    | 15.23 ± 2.37 | 12.08 ± 1.19    | 38.44 ± 2.88 | 38.93 ± 3.54    | 2.02 ± 0.23 | 1.89 ± 0.20     |
|                  | At the end (recovery)                   | 188.69 ± 204.14 | 74.49 ± 29.75   | 0.94 ± 0.05 | 0.94 ± 0.02     | 0.20 ± 0.02 | 0.19 ± 0.03     | 2.55 ± 0.13 | 1.73 ± 0.32     | 142.27 ± 16.83 | 174.71 ± 6.10*  | 19.90 ± 1.81 | 19.10 ± 0.91    | 36.13 ± 3.25  | 34.89 ± 2.66    | 15.41 ± 1.32 | 11.68 ± 0.99 *  | 27.70 ± 1.12 | 37.27 ± 4.28    | 3.64 ± 1.15 | 2.04 ± 0.39     |
| Treatment 3      | After flood                             | 68.53 ± 14.01   | 69.86 ± 12.10   | 1.34 ± 0.13 | 1.22 ± 0.05     | 0.23 ± 0.02 | 0.24 ± 0.00     | 2.68 ± 0.07 | 1.85 ± 0.11 **  | 185.63 ± 11.92 | 179.85 ± 9.07   | 27.3 ± 3.10  | 22.40 ± 1.70    | 43.41 ± 2.12  | 40.81 ± 3.38    | 15.23 ± 2.37 | 13.97 ± 2.69    | 27.70 ± 1.12 | 38.09 ± 3.72    | 2.02 ± 0.23 | 1.97 ± 0.06     |
|                  | At the end (recovery)                   | 188.69 ± 204.14 | 246.38 ± 336.35 | 0.94 ± 0.05 | 0.86 ± 0.05     | 0.20 ± 0.02 | 0.18 ± 0.02     | 2.55 ± 0.13 | 1.64 ± 0.11     | 142.27 ± 16.83 | 143.19 ± 27.29  | 19.90 ± 1.81 | 19.20 ± 3.03    | 36.13 ± 3.25  | 30.33 ± 3.71    | 15.41 ± 1.32 | 11.57 ± 1.11 *  | 27.70 ± 1.12 | 35.64 ± 5.90    | 3.64 ± 1.15 | 1.48 ± 0.10     |

\* p < 0.05. \*\* p < 0.01
